# Supplementary material
Source: MDPI journal article supplement (https://www.mdpi.com/2072-4292/13/13/2434)
Supplement: s1 [file s1]

Supplemental Table 1. Underwater Ponar samples from Grand (Big) Traverse Bay and Little Traverse Bay. 2013 samples rounded to nearest 5%. Others have 3+ sub-counts, with Standard Deviations (SD) and Coefficients of Variation (CV). Predicted Cu concentrations given from Gay Pile standard (100% = 2863 ug/g, ppm). Ponar samples arranged by Latitude.

| Latitude North | Longitude West | Date collected | Depth (m) | Station      | % stampsand | Individual % stampsand counts |      |      |          | SD  | CV   | Predicted Cu concentration |
|----------------|----------------|----------------|-----------|--------------|-------------|-------------------------------|------|------|----------|-----|------|----------------------------|
|                |                |                |           |              |             | 1st                           | 2nd  | 3rd  | 4th, 5th |     |      |                            |
| 47° 13.000     | 88° 09.000     | 7/11/13        | 10.4      |              | 0           |                               |      |      |          |     |      | 0                          |
| 47° 12.830     | 88° 08.670     | 7/11/13        | 10.2      |              | 0           |                               |      |      |          |     |      | 0                          |
| 47° 12.660     | 88° 10.420     | 5/29/13        | 1.6       |              | 90          |                               |      |      |          |     |      | 2577                       |
| 47° 12.640     | 88° 10.750     | 5/29/13        | 2.0       |              | 75          |                               |      |      |          |     |      | 2147                       |
| 47° 12.571     | 88° 10.682     | 7/17/19        | 3.0       | GP049        | 66.5        | 67.8                          | 66.4 | 65.4 |          | 1.2 | 1.8  | 1904                       |
| 47° 12.550     | 88° 12.580     | 8/23/13        | 5.0       |              | 30          |                               |      |      |          |     |      | 859                        |
| 47° 12.526     | 88° 12.307     | 7/17/19        | 3.6       | GP053        | 57.7        | 54.8                          | 60.1 | 58.2 |          | 2.7 | 4.7  | 1652                       |
| 47° 12.500     | 88° 12.450     | 5/29/13        | 3.5       |              | 100         |                               |      |      |          |     |      | 2863                       |
| 47° 12.481     | 88° 10.657     | 7/17/19        | 5.6       | GP050        | 66.7        | 65.8                          | 65.7 | 68.6 |          | 1.6 | 2.5  | 1910                       |
| 47° 12.480     | 88° 11.250     | 5/29/13        | 2.3       |              | 100         |                               |      |      |          |     |      | 2863                       |
| 47° 12.477     | 88° 11.443     | 8/15/12        | 4.2       | Gay 13       | 62.6        | 60.4                          | 64.6 | 62.7 |          | 2.1 | 3.4  | 1792                       |
| 47° 12.477     | 88° 12.443     | 8/15/12        | 3.5       | Gay 13       | 58.9        | 61.6                          | 57.5 | 57.5 |          | 2.4 | 4.0  | 1686                       |
| 47° 12.450     | 88° 11.830     | 5/29/13        | 2.2       |              | 100         |                               |      |      |          |     |      | 2863                       |
| 47° 12.440     | 88° 12.500     | 8/23/13        | 5.1       |              | 90          |                               |      |      |          |     |      | 2577                       |
| 47° 12.440     | 88° 11.164     | 8/22/16        | 8.7       | Gay-10       | 62.8        | 65.3                          | 58.1 | 64.9 |          | 4.0 | 6.4  | 1798                       |
| 47° 12.424     | 88° 12.152     | 9/20/16        | 7.3       | B-2          | 77.9        | 72                            | 78.3 | 83.3 |          | 5.7 | 7.3  | 2230                       |
| 47° 12.416     | 88° 11.965     | 8/22/16        | 4.2       | BRB-005      | 76.7        | 77.7                          | 75.1 | 77.3 |          | 1.4 | 1.8  | 2196                       |
| 47° 12.4124    | 88° 12.1516    | 9/9/16         | 7.3       | station B(2) | 77.9        | 67                            | 65.2 | 74.5 | 61.2     | 5.6 | 7.2  | 2230                       |
| 47° 12.352     | 88° 11.169     | 8/15/12        | 6.4       | Gay 14       | 52.9        | 50.5                          | 56.7 | 51.4 |          | 3.4 | 6.3  | 1515                       |
| 47° 12.340     | 88° 11.860     | 5/29/13        | 3.3       |              | 100         |                               |      |      |          |     |      | 2863                       |
| 47° 12.333     | 88° 12.500     | 9/9/16         | 8.0       | station D    | 77.8        | 82.6                          | 80.8 | 77.9 | 69.8     | 5.7 | 7.3  | 2227                       |
| 47° 12.333     | 88° 12.1667    | 9/9/16         | 7.9       | station G    | 74.9        | 78.8                          | 77.6 | 71   | 72.1     | 3.9 | 5.2  | 2144                       |
| 47° 12.3312    | 88° 12.3418    | 9/9/16         | 8.5       | station 1(A) | 79.3        | 73                            | 82.1 | 82.7 |          | 5.4 | 6.9  | 2270                       |
| 47° 12.330     | 88° 12.120     | 5/29/13        | 6.1       |              | 55          |                               |      |      |          |     |      | 1575                       |
| 47° 12.330     | 88° 11.660     | 5/29/13        | 5.3       |              | 25          |                               |      |      |          |     |      | 716                        |
| 47° 12.330     | 88° 09.330     | 5/29/13        | 29.8      |              | 30          |                               |      |      |          |     |      | 859                        |
| 47° 12.327     | 88° 12.537     | 6/18/13        | 6.2       |              | 75          |                               |      |      |          |     |      | 2147                       |
| 47° 12.318     | 88° 12.468     | 6/18/13        | 6.5       |              | 50          |                               |      |      |          |     |      | 1432                       |
| 47° 12.310     | 88° 12.410     | 8/23/13        | 7.9       |              | 50          |                               |      |      |          |     |      | 1432                       |
| 47° 12.308     | 88° 12.022     | 6/18/13        | 6.3       |              | 75          |                               |      |      |          |     |      | 2147                       |
| 47° 12.293     | 88° 9.605      | 8/22/16        | 25.0      | Gay-25       | 6.8         | 9.2                           | 5.1  | 6    |          | 2.2 | 31.7 | 195                        |

|             |             |         |      |             |      |      |      |      |            |     |      |      |
|-------------|-------------|---------|------|-------------|------|------|------|------|------------|-----|------|------|
| 47°12.290   | 88°11.930   | 5/29/13 | 7.9  |             | 90   |      |      |      |            |     |      | 2577 |
| 47° 12.273  | 88° 11.993  | 9/20/16 | 8.5  | station H-2 | 50.6 | 46.8 | 48.4 | 56   | 51         | 4.0 | 8.0  | 1449 |
| 47°12.250   | 88°11.950   | 5/29/13 | 6.3  |             | 65   |      |      |      |            |     |      | 1861 |
| 47° 12.246  | 88° 10.252  | 8/22/16 | 10.7 | station ?   | 13.2 | 15.9 | 13   | 10.6 |            | 2.7 | 20.1 | 378  |
| 47° 12.243  | 88° 12.328  | 8/22/16 | 6    | station 3   | 60.1 | 60.3 | 57.4 | 62.6 |            | 2.6 | 4.3  | 1721 |
| 47°12.220   | 88°11.830   | 5/29/13 | 7.9  |             | 60   |      |      |      |            |     |      | 1718 |
| 47° 12.219  | 88° 11.810  | 8/22/16 | 7.3  | station 2   | 55.6 | 59.1 | 47.6 | 60.2 |            | 7.0 | 12.6 | 1592 |
| 47° 12.196  | 88° 5.861   | 8/22/16 | 49.8 | Gay-50      | 3.7  | 5.6  | 2.7  | 2.8  |            | 1.6 | 44.5 | 106  |
| 47°12.190   | 88°11.300   | 5/29/13 | 10.6 |             | 25   |      |      |      |            |     |      | 716  |
| 47°12.190   | 88°11.040   | 5/29/13 | 12.9 |             | 10   |      |      |      |            |     |      | 286  |
| 47° 12.1854 | 88° 12.3077 | 9/20/16 | 8.5  | station B   | 67   |      |      |      |            |     |      | 1918 |
| 47°12.180   | 88°11.620   | 5/29/13 | 7.5  |             | 50   |      |      |      |            |     |      | 1432 |
| 47°12.180   | 88°11.250   | 5/29/13 | 8.6  |             | 25   |      |      |      |            |     |      | 716  |
| 47° 12.177  | 88° 11.676  | 9/20/16 | 9.3  | station J   | 35.6 | 33.2 | 35.5 | 38.2 |            | 2.5 | 7.0  | 1019 |
| 47°12.170   | 88°11.000   | 5/29/13 | 13.4 |             | 25   |      |      |      |            |     |      | 716  |
| 47° 12.170  | 88° 11.000  | 6/22/13 | 13.2 |             | 30   |      |      |      |            |     |      | 859  |
| 47°12.170   | 88°10.170   | 5/29/13 | 20.0 |             | 10   |      |      |      |            |     |      | 286  |
| 47° 12.170  | 88° 09.170  | 6/22/13 | 39.7 | USB002      | 10.4 | 8.2  | 12.7 | 10.4 |            | 2.3 | 21.6 | 298  |
| 47° 12.167  | 88° 11.500  | 6/11/18 | 13   | T-4         | 27.5 | 22.7 | 32.1 | 30   |            | 4.9 | 17.9 | 787  |
| 47° 12.1667 | 88° 12.500  | 9/9/16  | 7.8  | station E   | 19.9 | 17.6 | 15.8 | 29.9 | 15.1, 21.7 | 6.1 | 30.6 | 570  |
| 47° 12.1667 | 88°12.1667  | 9/9/16  | 9.7  | station H   | 39.3 | 39.5 | 38   | 45.5 | 34.1       | 4.7 | 12.0 | 1125 |
| 47° 12.126  | 88° 11.834  | 8/22/16 | 10.5 | BRB-10      | 38.5 | 41.1 | 36.6 | 37.8 |            | 2.3 | 6.1  | 1102 |
| 47°12.122   | 88°12.808   | 8/15/12 | 3.4  | Sta 3       | 63.5 | 62.9 | 60.6 | 67.1 |            | 3.3 | 5.2  | 1818 |
| 47° 12.114  | 88° 4.173   | 8/22/16 | 75.0 | Gay-75      | 3.8  | 3.4  | 3.9  | 4.2  |            | 0.4 | 10.6 | 109  |
| 47°12.081   | 88°12.248   | 8/15/12 | 8.8  | Gay 004     | 20.5 | 25   | 20   | 16.5 |            | 4.3 | 20.8 | 587  |
| 47°12.081   | 88°12.245   | 8/15/12 | 8.5  | Sta 4       | 17.4 | 14.3 | 17.8 | 20.1 |            | 2.9 | 16.8 | 498  |
| 47°12.080   | 88°12.250   | 5/29/13 | 8.6  |             | 40   |      |      |      |            |     |      | 1145 |
| 47° 12.080  | 88° 12.420  | 8/23/13 | 7.4  |             | 10   |      |      |      |            |     |      | 286  |
| 47° 12.046  | 88° 9.882   | 9/23/17 | 24.3 | BRB-25      | 5    | 2.6  | 5.6  | 6.8  |            | 2.2 | 43.3 | 143  |
| 47° 12.000  | 88° 12.333  | 9/9/16  | 10.7 | station C   | 27.6 | 23.2 | 21.6 | 32.8 | 32.8       | 6.0 | 21.9 | 790  |
| 47° 12.000  | 88° 12.1667 | 9/9/16  | 9.2  | station F   | 19.8 | 18.2 | 22.5 | 18.7 |            | 2.4 | 11.9 | 567  |
| 47° 12.000  | 88° 09.670  | 7/11/13 | 28.8 |             | 0    |      |      |      |            |     |      | 0    |
| 47°11.944   | 88°11.147   | 8/15/12 | 4.1  | Sta 10      | 73.1 | 73.6 | 71.7 | 74.1 |            | 1.3 | 1.7  | 2093 |
| 47° 11.910  | 88° 8.367   | 9/23/17 | 48.7 | BRB-50      | 6.7  | 5.7  | 6.7  | 7.7  |            | 1.0 | 14.9 | 192  |
| 47°11.880   | 88°12.520   | 5/29/13 | 7.0  |             | 30   |      |      |      |            |     |      | 859  |
| 47°11.870   | 88°13.017   | 8/15/12 | 3.7  | Sta 2       | 64.3 | 65.2 | 62.7 | 65   |            | 1.4 | 2.2  | 1841 |
| 47°11.836   | 88°12.525   | 8/15/12 | 9.8  | Sta 5       | 54.4 | 54.9 | 55.1 | 53.1 |            | 1.1 | 2.0  | 1557 |
| 47° 11.820  | 88° 13.400  | 8/23/13 | 5.2  | T07W01      | 29.2 | 27.9 | 33.2 | 26.6 |            | 3.5 | 12.0 | 836  |

|            |            |         |      |           |      |      |      |      |     |      |      |
|------------|------------|---------|------|-----------|------|------|------|------|-----|------|------|
| 47° 11.667 | 88° 13.031 | 8/22/16 | 11.0 | BR2-10    | 11.8 | 12.2 | 11.9 | 11.4 | 0.4 | 3.4  | 338  |
| 47°11.660  | 88°10.000  | 5/29/13 | 22.0 |           | 10   |      |      |      |     |      | 286  |
| 47 11.650  | 88°13.170  | 5/29/13 | 7.5  |           | 30   |      |      |      |     |      | 859  |
| 47° 11.630 | 88° 13.300 | 8/23/13 | 3.6  |           | 75   |      |      |      |     |      | 2147 |
| 47° 11.630 | 88° 13.270 | 8/23/13 | 8.6  |           | 60   |      |      |      |     |      | 1718 |
| 47° 11.630 | 88° 13.190 | 8/23/13 | 3.7  |           | 70   |      |      |      |     |      | 2004 |
| 47°11.611  | 88°13.214  | 8/15/12 | 8.9  | Gay 001   | 51.4 | 54.7 | 51.1 | 48.5 | 3.1 | 6.1  | 1472 |
| 47°11.611  | 88°13.214  | 8/15/12 | 8.9  | Sta 1     | 51.5 | 51.2 | 50   | 53.3 | 1.7 | 3.2  | 1474 |
| 47°11.598  | 88°12.774  | 8/15/12 | 11.5 | Gay 6     | 19.6 | 18   | 21.1 | 19.6 | 1.6 | 7.9  | 561  |
| 47°11.598  | 88°12.774  | 8/15/12 | 13.4 | Sta 6     | 10.1 | 9.4  | 12.1 | 8.8  | 1.8 | 17.4 | 289  |
| 47°11.598  | 88°12.261  | 8/15/12 | 6    | Sta 7     | 74.3 | 75.6 | 70.3 | 76.9 | 3.5 | 4.7  | 2127 |
| 47°11.500  | 88°13.510  | 5/29/13 | 8.8  |           | 50   |      |      |      |     |      | 1432 |
| 47° 11.500 | 88° 13.190 | 8/23/13 | 10.1 |           | 40   |      |      |      |     |      | 1145 |
| 47° 11.500 | 88° 13.160 | 8/23/13 | 10.3 |           | 45   |      |      |      |     |      | 1288 |
| 47°11.500  | 88°12.920  | 5/29/13 | 8.5  |           | 30   |      |      |      |     |      | 859  |
| 47° 11.500 | 88° 12.833 | 5/26/17 | 9.1  | S12       | 9.4  |      |      |      |     |      | 269  |
| 47° 11.500 | 88° 11.500 | 5/26/17 | 11.2 | S18       | 9    |      |      |      |     |      | 258  |
| 47° 11.500 | 88° 11.000 | 6/22/13 | 22.0 |           | 5    |      |      |      |     |      | 143  |
| 47° 11.480 | 88° 12.790 | 8/23/13 | 12.7 |           | 20   |      |      |      |     |      | 573  |
| 47°11.390  | 88°13.900  | 5/29/13 | 4.7  |           | 65   |      |      |      |     |      | 1861 |
| 47° 11.386 | 88° 13.203 | 8/22/16 | 11.0 | station 5 | 23   | 22.7 | 21.7 | 24.8 | 1.6 | 6.9  | 658  |
| 47° 11.340 | 88° 13.170 | 6/22/13 | 11.8 |           | 10   |      |      |      |     |      | 286  |
| 47° 11.340 | 88° 13.000 | 6/22/13 | 12.5 |           | 10   |      |      |      |     |      | 286  |
| 47° 11.340 | 88° 12.670 | 6/22/13 | 13.8 |           | 10   |      |      |      |     |      | 286  |
| 47° 11.340 | 88° 11.340 | 6/22/13 | 20.0 |           | 10   |      |      |      |     |      | 286  |
| 47° 11.333 | 88° 13.00  | 5/26/17 | 10.9 | S1        | 15   |      |      |      |     |      | 429  |
| 47° 11.333 | 88° 12.833 | 5/26/17 | 10.9 | S2        | 6    |      |      |      |     |      | 172  |
| 47° 11.333 | 88° 12.666 | 5/26/17 | 10.3 | S3        | 7.1  |      |      |      |     |      | 203  |
| 47° 11.333 | 88° 12.166 | 5/26/17 | 11.2 | S6        | 10.2 |      |      |      |     |      | 292  |
| 47° 11.296 | 88° 14.149 | 7/31/17 | 2.0  | OP 8      | 26.4 |      |      |      |     |      | 756  |
| 47° 11.27  | 88° 14.106 | 7/31/17 | 4.2  | OP 7      | 31.9 |      |      |      |     |      | 913  |
| 47° 11.253 | 88° 13.958 | 7/31/17 | 6.5  | OP 3      | 44.9 |      |      |      |     |      | 1285 |
| 47°11.250  | 88°13.960  | 5/29/13 | 4.7  |           | 50   |      |      |      |     |      | 1432 |
| 47° 11.250 | 88° 13.919 | 7/31/17 | 7.4  | OP 2      | 49.2 |      |      |      |     |      | 1409 |
| 47° 11.248 | 88° 14.002 | 7/31/17 | 5.8  | OP 4      | 37.5 |      |      |      |     |      | 1074 |
| 47° 11.247 | 88° 14.053 | 7/31/17 | 5.1  | OP 5      | 21   |      |      |      |     |      | 601  |
| 47° 11.241 | 88° 14.086 | 7/31/17 | 5.0  | OP 6      | 34.1 |      |      |      |     |      | 976  |
| 47° 11.23  | 88° 14.244 | 7/31/17 | 2.1  | OP 9      | 23.4 |      |      |      |     |      | 670  |

|             |             |         |       |           |      |      |      |      |             |     |      |      |
|-------------|-------------|---------|-------|-----------|------|------|------|------|-------------|-----|------|------|
| 47° 11.230  | 88° 13.020  | 8/23/13 | 12.3  |           | 20   |      |      |      |             |     |      | 573  |
| 47° 11.199  | 88° 14.148  | 7/31/17 | 4.5   | OP 19     | 12   | 19.6 | 9.1  | 13   | 6.3         | 5.8 | 48.0 | 344  |
| 47° 11.1975 | 88° 13.3958 | 6/11/18 | 13.0  | C1        | 11.6 | 7.9  | 10.9 | 12.8 | 14.6        | 2.9 | 24.7 | 332  |
| 47° 11.166  | 88° 13.166  | 5/26/17 | 10.3  | S16       | 8.1  |      |      |      |             |     |      | 232  |
| 47° 11.166  | 88° 13.00   | 5/26/17 | 10.3  | S17       | 7.9  |      |      |      |             |     |      | 226  |
| 47° 11.166  | 88° 12.833  | 5/26/17 | 10.3  | S9        | 8.9  |      |      |      |             |     |      | 255  |
| 47° 11.165  | 88° 13.972  | 7/31/17 | 7.8   | OP 18     | 18.8 | 16.5 | 18   | 22   |             | 2.8 | 15.1 | 538  |
| 47° 11.15   | 88° 14.141  | 7/31/17 | 5.1   | OP 10     | 17.2 |      |      |      |             |     |      | 492  |
| 47° 11.137  | 88° 13.885  | 7/31/17 | 9.2   | OP 17     | 29.8 | 27.9 | 26.2 | 37.7 | 27.3        | 5.3 | 17.9 | 853  |
| 47° 11.0971 | 88° 14.0010 | 6/11/18 | 7.5   | A2        | 43.2 | 41.4 | 42.2 | 46   |             | 2.5 | 5.7  | 1237 |
| 47° 11.097  | 88° 14.303  | 7/31/17 | 2.1   | OP 11     | 9.7  |      |      |      |             |     |      | 278  |
| 47° 11.047  | 88° 13.008  | 8/22/16 | 11.0  | station 4 | 36.6 | 36.3 | 46.4 | 27.2 |             | 9.6 | 26.2 | 1048 |
| 47° 11.022  | 88° 9.470   | 8/22/16 | 51.0  | BR2-50    | 3.7  | 2.8  | 4.7  | 3.6  |             | 1.0 | 25.8 | 106  |
| 47° 11.000  | 88° 14.170  | 6/22/13 | 4.5   |           | 10   |      |      |      |             |     |      | 286  |
| 47° 11.000  | 88° 14.090  | 5/29/13 | 5.6   |           | 10   |      |      |      |             |     |      | 286  |
| 47° 11.000  | 88° 14.000  | 6/22/13 | 7.9   |           | 5    |      |      |      |             |     |      | 143  |
| 47° 11.000  | 88° 12.330  | 5/29/13 | 18.0  |           | 25   |      |      |      |             |     |      | 716  |
| 47° 11.000  | 88° 11.670  | 7/11/13 | 25.5  |           | 0    |      |      |      |             |     |      | 0    |
| 47° 10.9970 | 88° 13.9272 | 6/11/18 | 10.5  | A3        | 42.9 | 36.6 | 46.1 | 44.9 | 44.2        | 4.3 | 10.0 | 1228 |
| 47° 10.991  | 88° 11.908  | 8/22/16 | 24.5  | BR-2-25   | 7.9  | 5.6  | 8.3  | 9.9  |             | 2.2 | 27.5 | 226  |
| 47° 10.9822 | 88° 13.4975 | 6/11/18 | 14.0  | B3        | 15.6 | 15.3 | 15.8 | 15.7 |             | 0.3 | 1.7  | 447  |
| 47° 10.986  | 88° 5.861   | 8/22/16 | 101.0 | BR2-100   | 2.4  | 2.3  | 3.5  | 1.3  |             | 1.1 | 45.9 | 69   |
| 47° 10.9759 | 88° 13.5337 | 9/20/16 | 10.8  | station N | 11.3 | 8.5  | 13.1 | 12.2 |             | 2.4 | 21.6 | 324  |
| 47° 10.968  | 88° 14.213  | 7/31/17 | 4.5   | OP 12     | 18.6 | 15.1 | 17.9 | 22.7 |             | 3.8 | 20.7 | 533  |
| 47° 10.834  | 88° 13.842  | 9/24/19 | 10.7  | ES.T01    | 34.5 | 31   | 33.8 | 38.8 |             | 4.0 | 11.5 | 988  |
| 47° 10.830  | 88° 13.000  | 7/11/13 | 15.5  |           | 0    |      |      |      |             |     |      | 0    |
| 47° 10.830  | 88° 12.000  | 7/11/13 | 26.4  |           | 0    |      |      |      |             |     |      | 0    |
| 47° 10.800  | 88° 11.300  | 7/29/10 | 28.0  | GA0018    | 25   |      |      |      |             |     |      | 716  |
| 47° 10.799  | 88° 14.376  | 7/31/17 | 1.9   | OP 14     | 14.3 | 8.9  | 14.6 | 19.4 |             | 5.3 | 36.8 | 409  |
| 47° 10.794  | 88° 14.257  | 7/31/17 | 4.8   | OP 13     | 24.9 | 18.6 | 42.1 | 26.7 | 3.4, 21, 22 | 9.0 | 36.0 | 713  |
| 47° 10.717  | 88° 12.428  | 6/18/13 | 22.7  |           | 0    |      |      |      |             |     |      | 0    |
| 47° 10.688  | 88° 13.130  | 6/18/13 | 22.5  |           | 10   |      |      |      |             |     |      | 286  |
| 47° 10.670  | 88° 14.170  | 6/22/13 | 6.9   |           | 0    |      |      |      |             |     |      | 0    |
| 47° 10.665  | 88° 13.811  | 9/24/19 | 11.3  | ES.T03    | 32.2 | 34.8 | 33.8 | 28.1 |             | 3.6 | 11.2 | 922  |
| 47° 10.656  | 88° 14.000  | 9/24/19 | 10.3  | ES.T02    | 37.6 | 35.8 | 37.9 | 39.1 |             | 1.7 | 4.4  | 1076 |
| 47° 10.590  | 88° 14.019  | 9/20/16 | 9.1   | station O | 15.9 | 23   | 11.7 | 13.6 | 15.3        | 5.0 | 31.2 | 455  |
| 47° 10.5153 | 88° 13.224  | 8/15/12 | 11.0  | BGT 2     | 46.5 | 50.1 | 41.9 | 47.4 |             | 4.2 | 9.0  | 1331 |
| 47° 10.510  | 88° 13.968  | 6/11/18 | 13.5  | A-4       | 6.6  | 4.8  | 8.1  | 7    |             | 1.7 | 25.5 | 189  |

|            |            |          |      |           |      |      |      |      |      |      |      |     |
|------------|------------|----------|------|-----------|------|------|------|------|------|------|------|-----|
| 47°10.506  | 88°13.826  | 9/24/19  | 11.5 | ES.T06    | 8.1  | 7.6  | 9.1  | 7.7  | 0.8  | 10.4 | 232  |     |
| 47° 10.500 | 88° 13.500 | 7/11/13  | 11.9 |           | 0    |      |      |      |      |      | 0    |     |
| 47°10.497  | 88°13.976  | 9/24/19  | 11.4 | ES.T05    | 11.9 | 13.7 | 8.2  | 13.7 | 3.2  | 26.7 | 341  |     |
| 47°10.478  | 88°13.043  | 8/15/12  | 15.0 | BGT 1     | 14.2 | 16.1 | 14.1 | 12.4 | 1.9  | 13.0 | 407  |     |
| 47° 10.440 | 88° 13.822 | 8/22/16  | 10.6 | station 7 | 18.2 | 19.5 | 14.9 | 20.1 | 2.8  | 15.6 | 521  |     |
| 47°10.311  | 88°14.163  | 9/24/19  | 9.5  | ES.T04    | 10.5 | 10   | 9.4  | 12   | 1.4  | 13.0 | 301  |     |
| 47° 10.308 | 88° 13.203 | 6/18/13  | 14.6 |           | 5    |      |      |      |      |      | 143  |     |
| 47°10.300  | 88°09.700  | 7/29/10  | 35.0 |           | 10   |      |      |      |      |      | 286  |     |
| 47° 10.170 | 88° 13.670 | 6/22/13  | 12.8 |           | 5    |      |      |      |      |      | 143  |     |
| 47° 10.000 | 88° 13.330 | 7/11/13  | 15.6 |           | 5    |      |      |      |      |      | 143  |     |
| 47° 10.000 | 88° 12.670 | 7/11/13  | 29.3 |           | 15   |      |      |      |      |      | 429  |     |
| 47°09.897  | 88° 14.330 | 6/18/13  | 6.1  |           | 5    |      |      |      |      |      | 143  |     |
| 47° 9.833  | 88° 12.66  | 8/22/16  | 29.1 | station 8 | 16.8 | 12.8 | 21.9 | 15.8 | 4.6  | 27.6 | 481  |     |
| 47°09.800  | 88°12.200  | 7/29/10  | 20.0 |           | 25   |      |      |      |      |      | 716  |     |
| 47°09.800  | 88°10.400  | 7/29/10  | 35.0 |           | 0    |      |      |      |      |      | 0    |     |
| 47° 09.670 | 88° 14.170 | 6/22/13  | 9.4  |           | 15   |      |      |      |      |      | 429  |     |
| 47° 09.670 | 88° 13.670 | 6/22/13  | 12.1 |           | 0    |      |      |      |      |      | 0    |     |
| 47° 09.670 | 88° 13.170 | 6/22/13  | 19.6 |           | 5    |      |      |      |      |      | 143  |     |
| 47° 09.670 | 88° 12.670 | 7/11/13  | 31.1 | SDW002    | 5    |      |      |      |      |      | 143  |     |
| 47° 09.670 | 88° 12.670 | 6/22/13  | 20.0 |           | 0    |      |      |      |      |      | 0    |     |
| 47° 09.670 | 88° 12.330 | 7/11/13  | 35.6 |           | 5    |      |      |      |      |      | 143  |     |
| 47° 9.582  | 88° 14.402 | 8/22/16  | 6.3  | CSI-5     | 17.2 | 18   | 13.4 | 20.3 | 3.5  | 20.4 | 492  |     |
| 47° 09.547 | 88° 14.300 | 6/18/13  | 9.4  |           | 10   |      |      |      |      |      | 286  |     |
| 47° 9.351  | 88° 12.913 | 10/17/17 | 24.7 | CSI-25    | 7.3  | 6.5  | 8.3  | 7.2  | 0.9  | 12.4 | 209  |     |
| 47° 9.192  | 88° 11.945 | 10/17/17 | 55.9 | CSI-50    | 6.1  | 4.5  | 8.5  | 5.2  | 2.1  | 35.0 | 175  |     |
| 47° 9.259  | 88° 14.298 | 7/31/17  | 4.9  | OP 15     | 14.5 | 12.2 | 13.9 | 17.5 | 2.7  | 18.7 | 415  |     |
| 47° 9.244  | 88° 14.379 | 7/31/17  | 2.0  | OP 16     | 7.9  | 5    | 9.6  | 9    | 2.5  | 31.7 | 226  |     |
| 47°09.200  | 88°11.300  | 7/29/10  | 25.0 |           | 0    |      |      |      |      |      | 0    |     |
| 47° 9.146  | 88° 11.689 | 10/17/17 | 72.2 | CSI-75    | 6.2  | 5.8  | 4.3  | 8.5  | 2.1  | 34.3 | 178  |     |
| 47° 7.695  | 88° 16.823 | 10/10/17 | 9.0  | LTB 010   | 7.1  | 5.2  | 3.3  | 9.2  | 10.7 | 3.4  | 48.4 | 203 |

Supplemental Table 2. Manganese Correction. Variables include unadjusted % SS, Cu Concentration, Mn adjusted % SS. Corrected and uncorrected values are compared. Table 1 has underwater bay sites. Triple asterisks indicate direct Mn particle counts.

| Latitude North | Longitude West | Date collected | Depth (m) | Station      | % Stampsand | Cu conc. not adjusted for Mn | Mn adjusted % SS | Estimated Cu conc. |     |
|----------------|----------------|----------------|-----------|--------------|-------------|------------------------------|------------------|--------------------|-----|
| 47° 13.000     | 88° 09.000     | 7/11/13        | 10.4      |              | 0           | 0                            | 0                | 0                  | *   |
| 47° 12.830     | 88° 08.670     | 7/11/13        | 10.2      |              | 0           | 0                            | 0                | 0                  | *   |
| 47°12.660      | 88°10.420      | 5/29/13        | 1.6       |              | 90          | 2577                         | 88.4             | 2531               | **  |
| 47°12.640      | 88°10.750      | 5/29/13        | 2.0       |              | 75          | 2147                         | 73.4             | 2101               | **  |
| 47°12.571      | 88°10.682      | 7/17/19        | 3.0       | GP049        | 65.5        | 1875                         | 63.9             | 1829               | *** |
| 47° 12.550     | 88° 12.580     | 8/23/13        | 5.0       |              | 30          | 859                          | 28.4             | 813                | **  |
| 47°12.526      | 88°12.307      | 7/17/19        | 3.6       | GP053        | 57.7        | 1652                         | 56.1             | 1606               | *** |
| 47°12.500      | 88°12.450      | 5/29/13        | 3.5       |              | 100         | 2863                         | 98.4             | 2817               | **  |
| 47°12.481      | 88°10.657      | 7/17/19        | 5.6       | GP048        | 64.9        | 1858                         | 63.3             | 1812               | *** |
| 47°12.480      | 88°11.250      | 5/29/13        | 2.3       |              | 100         | 2863                         | 98.4             | 2817               | **  |
| 47°12.477      | 88°11.443      | 8/15/12        | 4.2       | Gay 13       | 62.6        | 1792                         | 61               | 1746               | *** |
| 47°12.477      | 88°12.443      | 8/15/12        | 3.5       | Gay 13       | 58.9        | 1686                         | 57.3             | 1640               | **  |
| 47°12.450      | 88°11.830      | 5/29/13        | 2.2       |              | 100         | 2863                         | 98.4             | 2817               | **  |
| 47° 12.440     | 88° 12.500     | 8/23/13        | 5.1       |              | 90          | 2577                         | 88.4             | 2531               | **  |
| 47° 12.440     | 88° 11.164     | 8/22/16        | 8.7       | Gay-10       | 62.8        | 1798                         | 61.2             | 1752               | **  |
| 47° 12.424     | 88° 12.152     | 9/20/16        | 7.3       | B-2          | 77.9        | 2230                         | 76.3             | 2184               | **  |
| 47° 12.416     | 88° 11.965     | 8/22/16        | 4.2       | BRB-005      | 76.7        | 2196                         | 75.1             | 2150               | **  |
| 47° 12.4124    | 88° 12.1516    | 9/9/16         | 7.3       | station B(2) | 77.9        | 2230                         | 76.3             | 2184               | *** |
| 47°12.352      | 88°11.169      | 8/15/12        | 6.4       | Gay 14       | 52.9        | 1515                         | 51.3             | 1469               | *** |
| 47°12.340      | 88°11.860      | 5/29/13        | 3.3       |              | 100         | 2863                         | 98.4             | 2817               | **  |
| 47° 12.333     | 88° 12.500     | 9/9/16         | 8.0       | station D    | 77.8        | 2227                         | 76.2             | 2182               | *** |
| 47° 12.333     | 88° 12.1667    | 9/9/16         | 7.9       | station G    | 74.9        | 2144                         | 73.3             | 2099               | *** |
| 47° 12.3312    | 88° 12.3418    | 9/9/16         | 8.5       | station 1(A) | 79.3        | 2270                         | 77.7             | 2225               | *** |
| 47°12.330      | 88°12.120      | 5/29/13        | 6.1       |              | 55          | 1575                         | 53.4             | 1529               | **  |
| 47°12.330      | 88°11.660      | 5/29/13        | 5.3       |              | 25          | 716                          | 23.4             | 670                | **  |
| 47°12.330      | 88°09.330      | 5/29/13        | 29.8      |              | 30          | 859                          | 28.4             | 813                | **  |
| 47°12.327      | 88° 12.537     | 6/18/13        | 6.2       |              | 75          | 2147                         | 73.4             | 2101               | **  |
| 47° 12.318     | 88° 12.468     | 6/18/13        | 6.5       |              | 50          | 1432                         | 48.4             | 1386               | **  |
| 47° 12.310     | 88° 12.410     | 8/23/13        | 7.9       |              | 50          | 1432                         | 48.4             | 1386               | **  |
| 47° 12.308     | 88° 12.022     | 6/18/13        | 6.3       |              | 75          | 2147                         | 73.4             | 2101               | **  |
| 47° 12.293     | 88° 9.605      | 8/22/16        | 25.0      | Gay-25       | 6.8         | 195                          | 5.2              | 149                | **  |

|             |             |         |      |             |      |      |      |      |     |
|-------------|-------------|---------|------|-------------|------|------|------|------|-----|
| 47°12.290   | 88°11.930   | 5/29/13 | 7.9  |             | 90   | 2577 | 88.4 | 2531 | **  |
| 47° 12.273  | 88° 11.993  | 9/20/16 | 8.5  | station H-2 | 50.6 | 1449 | 49   | 1403 | *** |
| 47°12.250   | 88°11.950   | 5/29/13 | 6.3  |             | 65   | 1861 | 63.4 | 1815 | **  |
| 47° 12.246  | 88° 10.252  | 8/22/16 | 10.7 | station ?   | 13.2 | 378  | 11.6 | 332  | **  |
| 47° 12.243  | 88° 12.328  | 8/22/16 | 6    | station 3   | 60.1 | 1721 | 58.5 | 1675 | **  |
| 47°12.220   | 88°11.830   | 5/29/13 | 7.9  |             | 60   | 1718 | 58.4 | 1672 | **  |
| 47° 12.219  | 88° 11.810  | 8/22/16 | 7.3  | station 2   | 55.6 | 1592 | 54   | 1546 | *** |
| 47° 12.196  | 88° 5.861   | 8/22/16 | 49.8 | Gay-50      | 3.7  | 106  | 2.1  | 60   | **  |
| 47°12.190   | 88°11.300   | 5/29/13 | 10.6 |             | 25   | 716  | 23.4 | 670  | **  |
| 47°12.190   | 88°11.040   | 5/29/13 | 12.9 |             | 10   | 286  | 8.4  | 240  | **  |
| 47° 12.1854 | 88° 12.3077 | 9/20/16 | 8.5  | station B   | 67   | 1918 | 65.4 | 1872 | **  |
| 47°12.180   | 88°11.620   | 5/29/13 | 7.5  |             | 50   | 1432 | 48.4 | 1386 | **  |
| 47°12.180   | 88°11.250   | 5/29/13 | 8.6  |             | 25   | 716  | 23.4 | 670  | **  |
| 47° 12.177  | 88° 11.676  | 9/20/16 | 9.3  | station J   | 35.6 | 1019 | 34   | 973  | *** |
| 47°12.170   | 88°11.000   | 5/29/13 | 13.4 |             | 25   | 716  | 23.4 | 670  | **  |
| 47° 12.170  | 88° 11.000  | 6/22/13 | 13.2 |             | 30   | 859  | 28.4 | 813  | **  |
| 47°12.170   | 88°10.170   | 5/29/13 | 20.0 |             | 10   | 286  | 8.4  | 240  | **  |
| 47° 12.170  | 88° 09.170  | 6/22/13 | 39.7 | USB002      | 10.4 | 298  | 8.8  | 252  | *** |
| 47° 12.167  | 88° 11.500  | 6/11/18 | 13   | T-4         | 27.5 | 787  | 25.9 | 742  | *** |
| 47° 12.1667 | 88° 12.500  | 9/9/16  | 7.8  | station E   | 19.9 | 570  | 18.3 | 524  | *** |
| 47° 12.1667 | 88°12.1667  | 9/9/16  | 9.7  | station H   | 39.3 | 1125 | 37.7 | 1079 | *** |
| 47° 12.126  | 88° 11.834  | 8/22/16 | 10.5 | BRB-10      | 38.5 | 1102 | 36.9 | 1056 | **  |
| 47°12.122   | 88°12.808   | 8/15/12 | 3.4  | Sta 3       | 63.5 | 1818 | 61.9 | 1772 | **  |
| 47° 12.114  | 88° 4.173   | 8/22/16 | 75.0 | Gay-75      | 3.8  | 109  | 2.2  | 63   | **  |
| 47°12.081   | 88°12.248   | 8/15/12 | 8.8  | Gay 4       | 20.5 | 587  | 18.9 | 541  | **  |
| 47°12.081   | 88°12.245   | 8/15/12 | 8.5  | Sta 4       | 17.4 | 498  | 15.8 | 452  | **  |
| 47°12.080   | 88°12.250   | 5/29/13 | 8.6  |             | 40   | 1145 | 38.4 | 1099 | **  |
| 47° 12.080  | 88° 12.420  | 8/23/13 | 7.4  |             | 10   | 286  | 8.4  | 240  | **  |
| 47° 12.046  | 88° 9.882   | 9/23/17 | 24.3 | BRB-25      | 5    | 143  | 3.4  | 97   | **  |
| 47° 12.00   | 88° 12.333  | 9/9/16  | 10.7 | station C   | 27.6 | 790  | 26   | 744  | *** |
| 47° 12.00   | 88° 12.1667 | 9/9/16  | 9.2  | station F   | 19.8 | 567  | 18.2 | 521  | *** |
| 47° 12.000  | 88° 09.670  | 7/11/13 | 28.8 |             | 0    | 0    | 0    | 0    | *   |
| 47°11.944   | 88°11.147   | 8/15/12 | 4.1  | Sta 10      | 73.1 | 2093 | 71.5 | 2047 | **  |
| 47° 11.910  | 88° 8.367   | 9/23/17 | 48.7 | BRB-50      | 6.7  | 192  | 5.1  | 146  | **  |
| 47°11.880   | 88°12.520   | 5/29/13 | 7.0  |             | 30   | 859  | 28.4 | 813  | **  |
| 47°11.870   | 88°13.017   | 8/15/12 | 3.7  | Sta 2       | 64.3 | 1841 | 62.7 | 1795 | **  |

|            |            |         |      |           |      |      |      |      |     |
|------------|------------|---------|------|-----------|------|------|------|------|-----|
| 47°11.836  | 88°12.525  | 8/15/12 | 9.8  | Sta 5     | 54.4 | 1557 | 52.8 | 1512 | **  |
| 47° 11.820 | 88° 13.400 | 8/23/13 | 5.2  | T07W01    | 29.2 | 836  | 27.6 | 790  | **  |
| 47° 11.667 | 88° 13.031 | 8/22/16 | 11.0 | BR2-10    | 11.8 | 338  | 10.2 | 292  | **  |
| 47°11.660  | 88°10.000  | 5/29/13 | 22.0 |           | 10   | 286  | 8.4  | 240  | **  |
| 47 11.650  | 88°13.170  | 5/29/13 | 7.5  |           | 30   | 859  | 28.4 | 813  | **  |
| 47° 11.630 | 88° 13.300 | 8/23/13 | 3.6  |           | 75   | 2147 | 73.4 | 2101 | **  |
| 47° 11.630 | 88° 13.270 | 8/23/13 | 8.6  |           | 60   | 1718 | 58.4 | 1672 | **  |
| 47° 11.630 | 88° 13.190 | 8/23/13 | 3.7  |           | 70   | 2004 | 68.4 | 1958 | **  |
| 47°11.611  | 88°13.214  | 8/15/12 | 8.9  | Gay 1     | 51.4 | 1472 | 49.8 | 1426 | **  |
| 47°11.611  | 88°13.214  | 8/15/12 | 8.9  | Sta 1     | 51.5 | 1474 | 49.9 | 1429 | **  |
| 47°11.598  | 88°12.774  | 8/15/12 | 11.5 | Gay 6     | 19.6 | 561  | 18   | 515  | *** |
| 47°11.598  | 88°12.774  | 8/15/12 | 13.4 | Sta 6     | 10.1 | 289  | 8.5  | 243  | **  |
| 47°11.598  | 88°12.261  | 8/15/12 | 6    | Sta 7     | 74.3 | 2127 | 72.7 | 2081 | **  |
| 47°11.500  | 88°13.510  | 5/29/13 | 8.8  |           | 50   | 1432 | 48.4 | 1386 | **  |
| 47° 11.500 | 88° 13.190 | 8/23/13 | 10.1 |           | 40   | 1145 | 38.4 | 1099 | **  |
| 47° 11.500 | 88° 13.160 | 8/23/13 | 10.3 |           | 45   | 1288 | 43.4 | 1243 | **  |
| 47°11.500  | 88°12.920  | 5/29/13 | 8.5  |           | 30   | 859  | 28.4 | 813  | **  |
| 47° 11.500 | 88° 12.833 | 5/26/17 | 9.1  | S12       | 9.4  | 269  | 7.8  | 223  | **  |
| 47° 11.500 | 88° 12.833 | 5/26/17 | 9.1  | S13       | 7.3  | 209  | 5.7  | 163  | **  |
| 47° 11.500 | 88° 12.500 | 5/26/17 | 9.1  | S14       | 12.1 | 346  | 10.5 | 301  | **  |
| 47° 11.500 | 88° 11.500 | 5/26/17 | 11.2 | S18       | 9    | 258  | 7.4  | 212  | **  |
| 47° 11.500 | 88° 11.000 | 6/22/13 | 22.0 |           | 5    | 143  | 3.4  | 97   | **  |
| 47° 11.480 | 88° 12.790 | 8/23/13 | 12.7 |           | 20   | 573  | 18.4 | 527  | **  |
| 47°11.390  | 88°13.900  | 5/29/13 | 4.7  |           | 65   | 1861 | 63.4 | 1815 | **  |
| 47° 11.386 | 88° 13.203 | 8/22/16 | 11.0 | station 5 | 23   | 658  | 21.4 | 613  | *** |
| 47° 11.340 | 88° 13.170 | 6/22/13 | 11.8 |           | 10   | 286  | 8.4  | 240  | **  |
| 47° 11.340 | 88° 13.000 | 6/22/13 | 12.5 |           | 10   | 286  | 8.4  | 240  | **  |
| 47° 11.340 | 88° 12.670 | 6/22/13 | 13.8 |           | 10   | 286  | 8.4  | 240  | **  |
| 47° 11.340 | 88° 11.340 | 6/22/13 | 20.0 |           | 10   | 286  | 8.4  | 240  | **  |
| 47° 11.333 | 88° 13.00  | 5/26/17 | 10.9 | S1        | 15   | 429  | 13.4 | 384  | **  |
| 47° 11.333 | 88° 12.833 | 5/26/17 | 10.9 | S2        | 6    | 172  | 4.4  | 126  | **  |
| 47° 11.333 | 88° 12.666 | 5/26/17 | 10.3 | S3        | 7.1  | 203  | 5.5  | 157  | **  |
| 47° 11.333 | 88° 12.166 | 5/26/17 | 11.2 | S6        | 10.2 | 292  | 8.6  | 246  | *** |
| 47° 11.296 | 88° 14.149 | 7/31/17 | 2.0  | OP 8      | 26.4 | 756  | 24.8 | 710  | **  |
| 47° 11.27  | 88° 14.106 | 7/31/17 | 4.2  | OP 7      | 31.9 | 913  | 30.3 | 867  | **  |
| 47° 11.253 | 88° 13.958 | 7/31/17 | 6.5  | OP 3      | 44.9 | 1285 | 43.3 | 1240 | **  |



|             |             |         |       |           |      |      |      |      |     |
|-------------|-------------|---------|-------|-----------|------|------|------|------|-----|
| 47°11.250   | 88°13.960   | 5/29/13 | 4.7   |           | 50   | 1432 | 48.4 | 1386 | **  |
| 47° 11.250  | 88° 13.919  | 7/31/17 | 7.4   | OP 2      | 49.2 | 1409 | 47.6 | 1363 | **  |
| 47° 11.248  | 88° 14.002  | 7/31/17 | 5.8   | OP 4      | 37.5 | 1074 | 35.9 | 1028 | **  |
| 47° 11.247  | 88° 14.053  | 7/31/17 | 5.1   | OP 5      | 21   | 601  | 19.4 | 555  | **  |
| 47° 11.241  | 88° 14.086  | 7/31/17 | 5.0   | OP 6      | 34.1 | 976  | 32.5 | 930  | **  |
| 47° 11.23   | 88° 14.244  | 7/31/17 | 2.1   | OP 9      | 23.4 | 670  | 21.8 | 624  | **  |
| 47° 11.230  | 88° 13.020  | 8/23/13 | 12.3  |           | 20   | 573  | 18.4 | 527  | **  |
| 47° 11.199  | 88° 14.148  | 7/31/17 | 4.5   | OP 19     | 12   | 344  | 10.4 | 298  | **  |
| 47° 11.1975 | 88° 13.3958 | 6/11/18 | 13.0  | C1        | 11.6 | 332  | 10   | 286  | *** |
| 47° 11.166  | 88° 13.166  | 5/26/17 | 10.3  | S16       | 8.1  | 232  | 6.5  | 186  | **  |
| 47° 11.166  | 88° 13.00   | 5/26/17 | 10.3  | S17       | 7.9  | 226  | 6.3  | 180  | **  |
| 47° 11.166  | 88° 12.833  | 5/26/17 | 10.3  | S9        | 8.9  | 255  | 7.3  | 209  | *** |
| 47° 11.165  | 88° 13.972  | 7/31/17 | 7.8   | OP 18     | 18.8 | 538  | 17.2 | 492  | **  |
| 47° 11.15   | 88° 14.141  | 7/31/17 | 5.1   | OP 10     | 17.2 | 492  | 15.6 | 447  | **  |
| 47° 11.137  | 88° 13.885  | 7/31/17 | 9.2   | OP 17     | 29.8 | 853  | 28.2 | 807  | **  |
| 47° 11.097  | 88° 14.303  | 7/31/17 | 2.1   | OP 11     | 9.7  | 278  | 8.1  | 232  | **  |
| 47° 11.0971 | 88° 14.0010 | 6/11/18 | 7.5   | A2        | 43.2 | 1237 | 41.6 | 1191 | *** |
| 47° 11.047  | 88° 13.008  | 8/22/16 | 11.0  | station 4 | 36.6 | 1048 | 35   | 1002 | *** |
| 47° 11.022  | 88° 9.470   | 8/22/16 | 51.0  | BR2-50    | 3.7  | 106  | 2.1  | 60   | **  |
| 47° 11.000  | 88° 14.170  | 6/22/13 | 4.5   |           | 10   | 286  | 8.4  | 240  | **  |
| 47°11.000   | 88°14.090   | 5/29/13 | 5.6   |           | 10   | 286  | 8.4  | 240  | **  |
| 47° 11.000  | 88° 14.000  | 6/22/13 | 7.9   |           | 5    | 143  | 3.4  | 97   | **  |
| 47°11.000   | 88°12.330   | 5/29/13 | 18.0  |           | 25   | 716  | 23.4 | 670  | **  |
| 47° 11.000  | 88° 11.670  | 7/11/13 | 25.5  |           | 0    | 0    | 0    | 0    | *   |
| 47°10.9970  | 88°13.9272  | 6/11/18 | 10.5  | A3        | 42.9 | 1228 | 41.3 | 1182 | *** |
| 47° 10.991  | 88° 11.908  | 8/22/16 | 24.5  | BR-2-25   | 7.9  | 226  | 6.3  | 180  | **  |
| 47°10.9822  | 88°13.4975  | 6/11/18 | 14.0  | B3        | 15.6 | 447  | 14   | 401  | **  |
| 47° 10.986  | 88° 5.861   | 8/22/16 | 101.0 | BR2-100   | 2.4  | 69   | 0.8  | 23   | **  |
| 47° 10.9759 | 88° 13.5337 | 9/20/16 | 10.8  | station N | 11.3 | 324  | 9.7  | 278  | **  |
| 47° 10.968  | 88° 14.213  | 7/31/17 | 4.5   | OP 12     | 18.6 | 533  | 17   | 487  | **  |
| 47°10.834   | 88°13.842   | 9/24/19 | 10.7  | ES.T01    | 34.5 | 988  | 32.9 | 942  | *** |
| 47° 10.830  | 88° 13.000  | 7/11/13 | 15.5  |           | 0    | 0    | 0    | 0    | *   |
| 47° 10.830  | 88° 12.000  | 7/11/13 | 26.4  |           | 0    | 0    | 0    | 0    | *   |
| 47°10.800   | 88°11.300   | 7/29/10 | 28.0  | GA0018    | 25   | 716  | 23.4 | 670  | **  |
| 47° 10.799  | 88° 14.376  | 7/31/17 | 1.9   | OP 14     | 14.3 | 409  | 12.7 | 364  | **  |
| 47° 10.794  | 88° 14.257  | 7/31/17 | 4.8   | OP 13     | 24.9 | 713  | 23.3 | 667  | **  |

|            |            |          |      |           |      |      |      |      |     |
|------------|------------|----------|------|-----------|------|------|------|------|-----|
| 47°10.717  | 88° 12.428 | 6/18/13  | 22.7 |           | 0    | 0    | 0    | 0    | *   |
| 47° 10.688 | 88° 13.130 | 6/18/13  | 22.5 |           | 10   | 286  | 8.4  | 240  | **  |
| 47° 10.670 | 88° 14.170 | 6/22/13  | 6.9  |           | 0    | 0    | 0    | 0    | *   |
| 47°10.665  | 88°13.811  | 9/24/19  | 11.3 | ES.T03    | 32.2 | 922  | 30.6 | 876  | *** |
| 47°10.656  | 88°14.000  | 9/24/19  | 10.3 | ES.T02    | 37.6 | 1076 | 36   | 1031 | *** |
| 47° 10.590 | 88° 14.019 | 9/20/16  | 9.1  | station O | 15.9 | 455  | 14.3 | 409  | *** |
| 47°10.5153 | 88°13.224  | 8/15/12  | 11.0 | BGT 2     | 46.5 | 1331 | 44.9 | 1285 | **  |
| 47° 10.510 | 88° 13.968 | 6/11/18  | 13.5 | A-4       | 6.6  | 189  | 5    | 143  | **  |
| 47°10.506  | 88°13.826  | 9/24/19  | 11.5 | ES.T06    | 8.1  | 232  | 6.5  | 186  | **  |
| 47° 10.50  | 88° 13.380 | 6/11/18  | 10.8 | C-4       | 24.1 | 690  | 22.5 | 644  | *** |
| 47° 10.500 | 88° 13.500 | 7/11/13  | 11.9 | WSB010    | 0    | 0    | 0    | 0    | *   |
| 47°10.497  | 88°13.976  | 9/24/19  | 11.4 | ES.T05    | 11.9 | 341  | 10.3 | 295  | *** |
| 47°10.478  | 88°13.043  | 8/15/12  | 15.0 | BGT 1     | 14.2 | 407  | 12.6 | 361  | *** |
| 47° 10.440 | 88° 13.822 | 8/22/16  | 10.6 | station 7 | 18.2 | 521  | 16.6 | 475  | *** |
| 47°10.311  | 88°14.163  | 9/24/19  | 9.5  | ES.T04    | 10.5 | 301  | 8.9  | 255  | *** |
| 47° 10.308 | 88° 13.203 | 6/18/13  | 14.6 |           | 5    | 143  | 3.4  | 97   | **  |
| 47°10.300  | 88°09.700  | 7/29/10  | 35.0 |           | 10   | 286  | 8.4  | 240  | **  |
| 47° 10.170 | 88° 13.670 | 6/22/13  | 12.8 |           | 5    | 143  | 3.4  | 97   | **  |
| 47° 10.000 | 88° 13.330 | 7/11/13  | 15.6 |           | 5    | 143  | 3.4  | 97   | **  |
| 47° 10.000 | 88° 12.670 | 7/11/13  | 29.3 |           | 15   | 429  | 13.4 | 384  | **  |
| 47°09.897  | 88° 14.330 | 6/18/13  | 6.1  |           | 5    | 143  | 3.4  | 97   | **  |
| 47° 9.833  | 88° 12.66  | 8/22/16  | 29.1 | station 8 | 16.8 | 481  | 15.2 | 435  | *** |
| 47°09.800  | 88°12.200  | 7/29/10  | 20.0 |           | 25   | 716  | 23.4 | 670  | **  |
| 47°09.800  | 88°10.400  | 7/29/10  | 35.0 |           | 0    | 0    | 0    | 0    | *   |
| 47° 09.670 | 88° 14.170 | 6/22/13  | 9.4  |           | 15   | 429  | 13.4 | 384  | **  |
| 47° 09.670 | 88° 13.670 | 6/22/13  | 12.1 |           | 0    | 0    | 0    | 0    | *   |
| 47° 09.670 | 88° 13.170 | 6/22/13  | 19.6 |           | 5    | 143  | 3.4  | 97   | **  |
| 47° 09.670 | 88° 12.670 | 7/11/13  | 31.1 |           | 5    | 143  | 3.4  | 97   | **  |
| 47° 09.670 | 88° 12.670 | 6/22/13  | 20.0 |           | 0    | 0    | 0    | 0    | *   |
| 47° 09.670 | 88° 12.330 | 7/11/13  | 35.6 |           | 5    | 143  | 3.4  | 97   | **  |
| 47° 9.582  | 88° 14.402 | 8/22/16  | 6.3  | CSI-5     | 17.2 | 492  | 15.6 | 447  | **  |
| 47° 09.547 | 88° 14.300 | 6/18/13  | 9.4  |           | 10   | 286  | 8.4  | 240  | **  |
| 47° 9.351  | 88° 12.913 | 10/17/17 | 24.7 | CSI-25    | 7.3  | 209  | 5.7  | 163  | **  |
| 47° 9.192  | 88° 11.945 | 10/17/17 | 55.9 | CSI-50    | 6.1  | 175  | 4.5  | 129  | **  |
| 47° 9.259  | 88° 14.298 | 7/31/17  | 4.9  | OP 15     | 14.5 | 415  | 12.9 | 369  | **  |
| 47° 9.244  | 88° 14.379 | 7/31/17  | 2.0  | OP 16     | 7.9  | 226  | 6.3  | 180  | **  |

|           |            |          |      |         |     |     |     |     |    |
|-----------|------------|----------|------|---------|-----|-----|-----|-----|----|
| 47°09.200 | 88°11.300  | 7/29/10  | 25.0 |         | 0   | 0   | 0   | 0   | *  |
| 47° 9.146 | 88° 11.689 | 10/17/17 | 72.2 | CSI-75  | 6.2 | 178 | 4.6 | 132 | ** |
| 47° 7.695 | 88° 16.823 | 10/10/17 | 9.0  | LTB 010 | 7.1 | 203 | 5.5 | 157 | ** |

\*No correction, 0 value; \*\*Mean Mn subtracted (1.6%) and SS% corrected; \*\*\*Mn determined and %SS corrected

Supplemental Table 3. Macroinvertebrate density and diversity. Variables include lat-long, date collected, depth, % stamp sand (rounded to the nearest 5%), and taxa tallies (n/m<sup>2</sup>), total density, taxa richness, and Shannon Wiener Index H.

| Latitude North | Longitude West | Depth(m) | % Stamp sand |             |           |              |             |       |            |             |          |             | Total biota | Taxonomic |  |
|----------------|----------------|----------|--------------|-------------|-----------|--------------|-------------|-------|------------|-------------|----------|-------------|-------------|-----------|--|
|                |                |          | Diporeia     | Oligochaeta | Nematodae | Chironomidae | Sphaeriidae | Mysis | Gastropoda | Trichoptera | richness | Diversity H |             |           |  |
| 47° 11.820     | 88° 13.400'    | 5.2      | 0            | 0           | 0         | 0            | 96          | 192   | 0          | 0           | 0        | 287         | 2           | 0.635     |  |
| 47° 10.670     | 88° 14.170     | 6.9      | 0            | 345         | 364       | 268          | 57          | 77    | 57         | 77          | 57       | 1303        | 8           | 1.778     |  |
| 47° 12.830     | 88° 08.670     | 10.2     | 0            | 843         | 498       | 326          | 0           | 0     | 19         | 0           | 0        | 1686        | 4           | 1.075     |  |
| 47° 13.000     | 88° 09.000     | 10.4     | 0            | 38          | 287       | 19           | 172         | 211   | 96         | 19          | 38       | 881         | 4           | 1.705     |  |
| 47° 10.500     | 88° 13.500     | 11.9     | 0            | 96          | 96        | 19           | 192         | 19    | 0          | 0           | 38       | 460         | 6           | 1.488     |  |
| 47° 09.670     | 88° 13.670     | 12.1     | 0            | 19          | 0         | 0            | 211         | 230   | 0          | 77          | 0        | 537         | 4           | 1.127     |  |
| 47° 10.830     | 88° 13.000     | 15.5     | 0            | 38          | 0         | 38           | 115         | 115   | 38         | 0           | 19       | 364         | 6           | 1.59      |  |
| 47° 09.670     | 88° 12.670     | 20       | 0            | 0           | 0         | 230          | 38          | 134   | 0          | 0           | 0        | 402         | 3           | 0.909     |  |
| 47° 10.717     | 88° 12.428     | 22.7     | 0            | 671         | 96        | 0            | 192         | 57    | 0          | 0           | 0        | 1015        | 4           | 0.973     |  |
| 47° 09.200     | 88° 11.300     | 25       | 0            | 57          | 77        | 77           | 153         | 134   | 0          | 19          | 0        | 517         | 6           | 1.642     |  |
| 47° 11.000     | 88° 11.670     | 25.5     | 0            | 38          | 19        | 19           | 249         | 77    | 0          | 0           | 0        | 402         | 5           | 1.125     |  |
| 47° 10.830     | 88° 12.000     | 26.4     | 0            | 556         | 134       | 19           | 38          | 211   | 0          | 0           | 19       | 977         | 6           | 1.204     |  |
| 47° 12.000     | 88° 09.670     | 28.8     | 0            | 632         | 0         | 115          | 0           | 1111  | 0          | 0           | 0        | 1859        | 3           | 0.848     |  |
| 47° 09.800     | 88° 10.400     | 35       | 0            | 249         | 57        | 38           | 38          | 57    | 19         | 0           | 57       | 517         | 7           | 1.586     |  |
| 47° 09.897'    | 88° 14.330     | 6.1      | 5            | 307         | 402       | 77           | 920         | 249   | 0          | 0           | 0        | 1954        | 5           | 1.361     |  |
| 47° 11.000     | 88° 14.000     | 7.9      | 5            | 0           | 0         | 0            | 172         | 77    | 0          | 0           | 0        | 249         | 2           | 0.619     |  |
| 47° 10.170     | 88° 13.670     | 12.8     | 5            | 613         | 153       | 57           | 498         | 115   | 0          | 0           | 77       | 1514        | 6           | 1.434     |  |
| 47° 10.308     | 88° 13.203     | 14.6     | 5            | 134         | 0         | 58           | 19          | 38    | 0          | 96          | 77       | 422         | 6           | 1.641     |  |
| 47° 10.000     | 88° 13.330     | 15.6     | 5            | 0           | 0         | 115          | 19          | 57    | 0          | 0           | 0        | 192         | 3           | 0.896     |  |
| 47° 09.670     | 88° 13.170     | 19.6     | 5            | 19          | 19        | 0            | 77          | 38    | 0          | 96          | 0        | 249         | 5           | 1.41      |  |
| 47° 11.500     | 88° 11.000     | 22       | 5            | 766         | 172       | 0            | 0           | 0     | 57         | 0           | 0        | 996         | 3           | 0.669     |  |
| 47° 09.670     | 88° 12.670     | 31.1     | 5            | 57          | 77        | 172          | 0           | 0     | 0          | 38          | 0        | 345         | 4           | 1.222     |  |
| 47° 09.670     | 88° 12.330     | 35.6     | 5            | 345         | 77        | 134          | 172         | 517   | 96         | 96          | 77       | 1514        | 8           | 1.818     |  |
| 47° 11.000     | 88° 14.170     | 4.5      | 10           | 38          | 0         | 19           | 57          | 0     | 0          | 0           | 0        | 115         | 3           | 1.011     |  |
| 47° 11.000     | 88° 14.090     | 5.6      | 10           | 96          | 77        | 230          | 19          | 19    | 0          | 0           | 96       | 536         | 6           | 1.495     |  |
| 47° 12.080     | 88° 12.420     | 7.4      | 10           | 0           | 57        | 0            | 422         | 134   | 0          | 0           | 19       | 632         | 4           | 0.921     |  |
| 47° 09.547     | 88° 14.300     | 9.4      | 10           | 172         | 38        | 575          | 38          | 0     | 57         | 0           | 0        | 881         | 5           | 1.046     |  |
| 47° 11.340     | 88° 13.170     | 11.8     | 10           | 0           | 0         | 0            | 211         | 172   | 0          | 0           | 0        | 383         | 2           | 0.688     |  |
| 47° 11.340     | 88° 13.000     | 12.5     | 10           | 0           | 0         | 0            | 57          | 0     | 0          | 0           | 0        | 57          | 1           | 0         |  |
| 47° 12.190     | 88° 11.040     | 12.9     | 10           | 134         | 57        | 153          | 0           | 0     | 0          | 0           | 0        | 345         | 3           | 1.024     |  |
| 47° 11.340     | 88° 12.670     | 13.8     | 10           | 19          | 115       | 134          | 0           | 0     | 0          | 19          | 19       | 307         | 5           | 1.246     |  |
| 47° 12.170     | 88° 10.170     | 20       | 10           | 0           | 19        | 0            | 134         | 0     | 0          | 19          | 0        | 172         | 3           | 0.681     |  |
| 47° 11.340     | 88° 11.340     | 20       | 10           | 153         | 96        | 134          | 0           | 0     | 0          | 0           | 0        | 383         | 3           | 1.081     |  |
| 47° 11.660     | 88° 10.000     | 22       | 10           | 0           | 0         | 0            | 0           | 0     | 77         | 0           | 0        | 77          | 1           | 0         |  |
| 47° 10.688     | 88° 13.130     | 22.5     | 10           | 0           | 0         | 0            | 115         | 19    | 0          | 57          | 0        | 192         | 3           | 0.897     |  |
| 47° 10.300     | 88° 09.700     | 35       | 10           | 96          | 0         | 0            | 0           | 0     | 192        | 115         | 38       | 441         | 4           | 1.255     |  |
| 47° 09.670     | 88° 14.170     | 9.4      | 15           | 38          | 19        | 19           | 115         | 249   | 0          | 0           | 38       | 479         | 6           | 1.341     |  |
| 47° 10.000     | 88° 12.670     | 29.3     | 15           | 38          | 96        | 0            | 96          | 57    | 0          | 364         | 57       | 709         | 6           | 1.446     |  |

[illegible]
